# Supplementary material for: A Novel Ex Vivo System Using 3D Polymer Scaffold to Culture Circulating Tumor Cells from Breast Cancer Patients Exhibits Dynamic E-M Phenotypes
Source: MDPI journal article supplement (doi:10.3390/jcm8091473), 2019-09-16

**Figure S1: 3D PCL scaffolds exhibit good porosity and pore inter-connectivity and show the presence of cells.** (A) Representative SEM micrograph of scaffold in low magnification (i) and in higher magnification (arrows indicate porous structure of scaffold) (ii), single pore having a particular diameter of porogen used (250-425 $\mu$ m) (iii), arrows show pore interconnectivity (iv). Scale bar represents 5.0 mm in (i), 500  $\mu$ m in (ii) and (iv), 400  $\mu$ m in (iii). (B) Immunofluorescence images of F-actin (red) and nucleus (stained with Sytox green) in RBC-depleted nucleated cell pellet of patient samples cultured in 3D PCL scaffold for 14 days. Imaging was performed using Epi-fluorescence microscope. Scale bar represents 100  $\mu$ m. Images are representative of 2 independent patient samples.

**Figure S2 Active cell proliferation in breast cancer cell line (MDA-MB-231).** (A) Immunostaining for Ki-67 protein showed active cell proliferation in MDA-MB-231 cells; top panel minus primary negative control, middle panel showing Ki67 positivity at 20X magnification (A) and bottom panel at 60X (B) magnification. Imaging was performed using Epi-fluorescence microscope, scale bar represents 100  $\mu$ m (A, B).

**Figure S3: Expression of epithelial (E) and mesenchymal (M) markers across breast cancer cell lines.** Immunostaining indicates the differential expression of epithelial (E) type markers (pan-CK/CK18/E-cad/ZO-1) or mesenchymal (M) type markers (Vimentin/N-cad) in MCF7 and MDA MB 231 breast cancer cells (A and, B, respectively). Cells were stained for nucleus (blue), E-type markers (green), M-type markers (red). Imaging was performed using Epi-fluorescence microscope. Scale bar represents 100  $\mu$ m.

**Figure S4: E-M heterogeneity in breast cancer cell lines.** (A) Dual staining for epithelial (panCK) and mesenchymal (vimentin) marker across two different breast cancer cell lines (MCF7 and MDA-MB-231).

**Supplementary Table S1:** Clinical parameters of breast cancer patients (Invasive ductal carcinoma (IDC)) analyzed in this study

| Patient ID | Clinical status | Primary cancer | ER | PR | HER-2 | Diagnostic stage | Age |
|------------|-----------------|----------------|----|----|-------|------------------|-----|
| 18_09#31   | LU, BO          | Breast         | -  | +  | +     | IV               | 56  |
| 18_09#32   | LI, BO          | Breast         | +  | +  | +     | IV               | 52  |
| 18_09#33   | CAN             | Breast         | +  | +  | -     | IV               | 46  |
| 18_09#34   | LU, BO          | Breast         | +  | +  | -     | IV               | 34  |
| 18_09#35   | LI, BO          | Breast         | +  | +  | +     | IV               | 54  |
| 18_10#36   | BO              | Breast         | +  | +  | +     | IV               | 59  |
| 18_12#37   | LU, LN          | Breast         | -  | +  | -     | IV               | 26  |
| 19_01#38   | LI              | Breast         | -  | -  | +     | IV               | 53  |
| 19_01#39   | CAN, LN         | Breast         | -  | +  | +     | IV               | 37  |
| 19_01#40   | LI              | Breast         | +  | +  | -     | IV               | 49  |
| 19_02#41   | BO              | Breast         | +  | +  | -     | IV               | 42  |
| 19_02#42   | LU              | Breast         | +  | +  | +     | IV               | 60  |
| 19_02#43   | LU, BO          | Breast         | -  | +  | +     | IV               | 71  |
| 19_03#44   | LU, BO          | Breast         | -  | -  | -     | IV               | 73  |
| 19_03#45   | LU, LI          | Breast         | +  | +  | -     | IV               | 37  |
| 19_04#46   | LU, BR          | Breast         | -  | -  | -     | IV               | 44  |

Lung- LU, Liver-LI, Bone-BO, Brain- BR, Contralateral axillary node- CAN, Lymph node- LN

**Figure S1.**

**A**

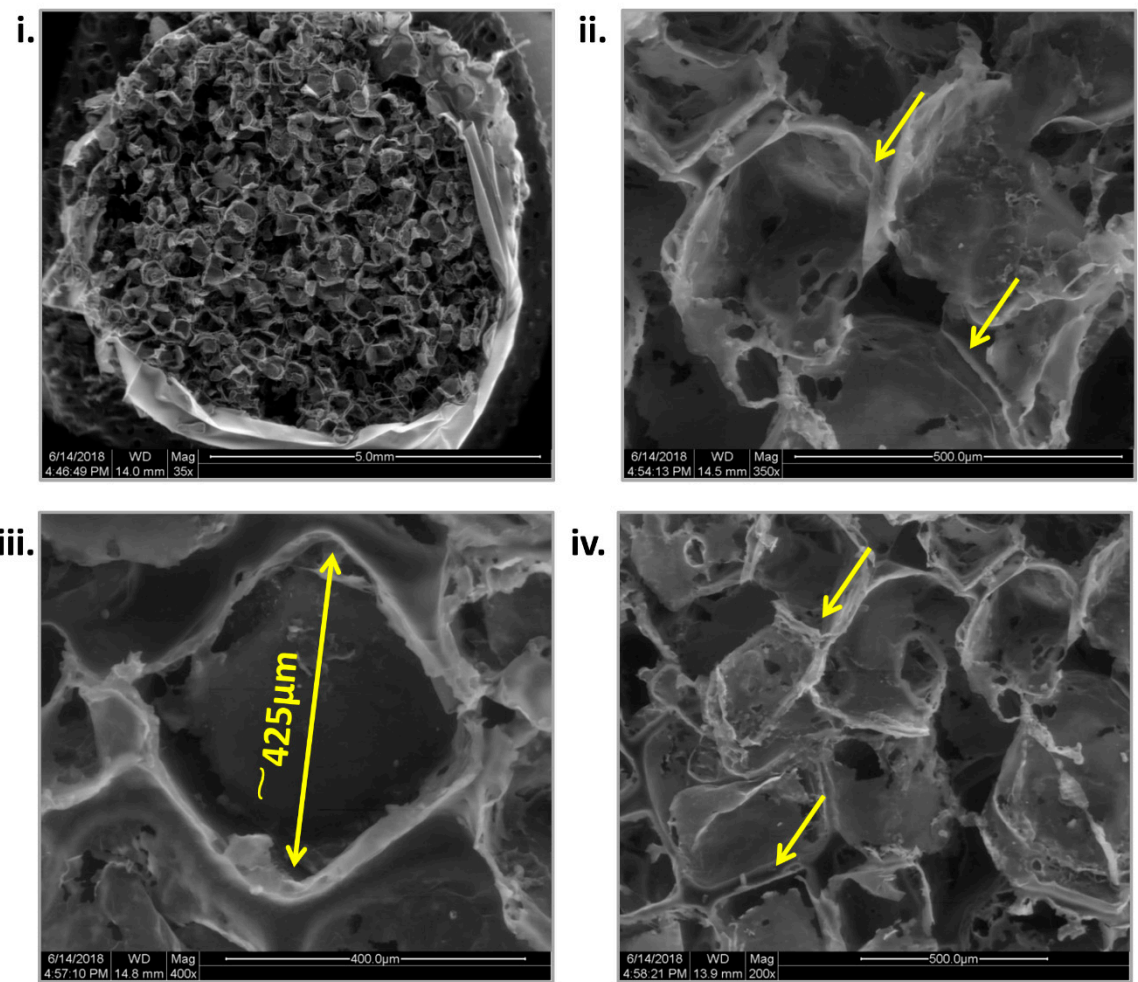

**B**

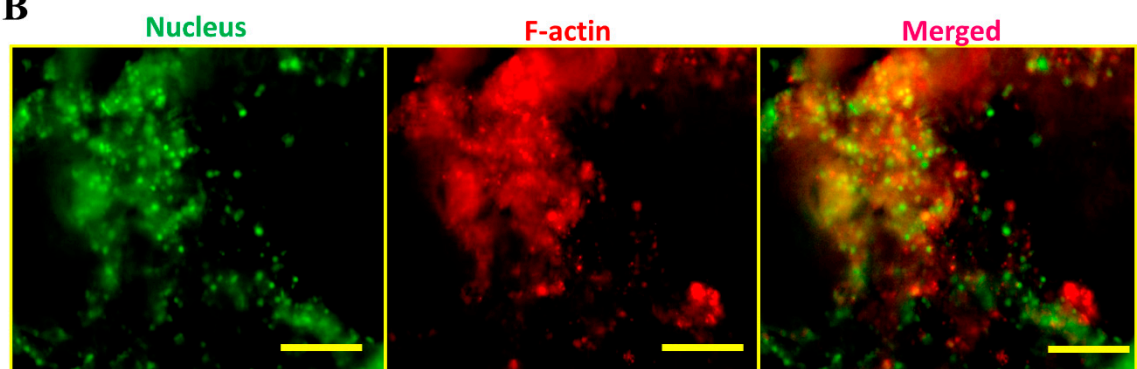

Figure S2.

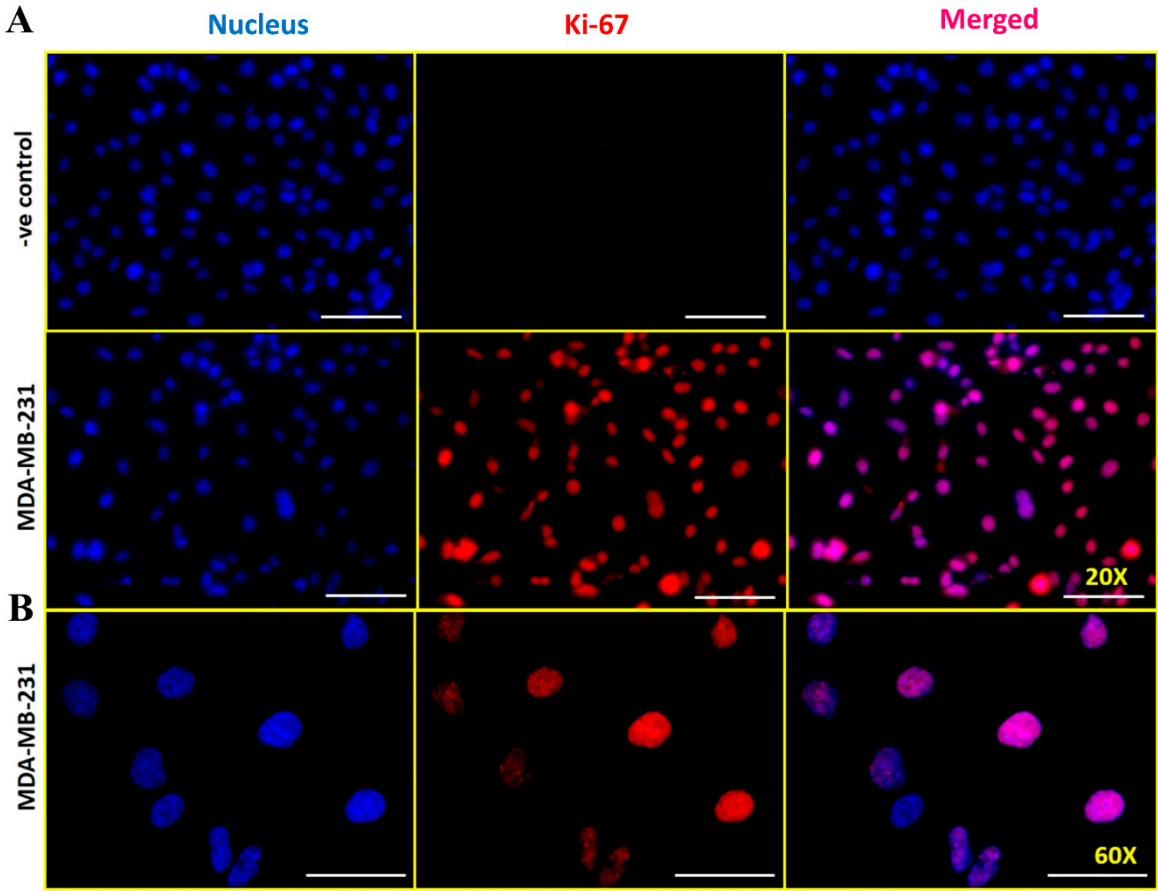

Figure S3.

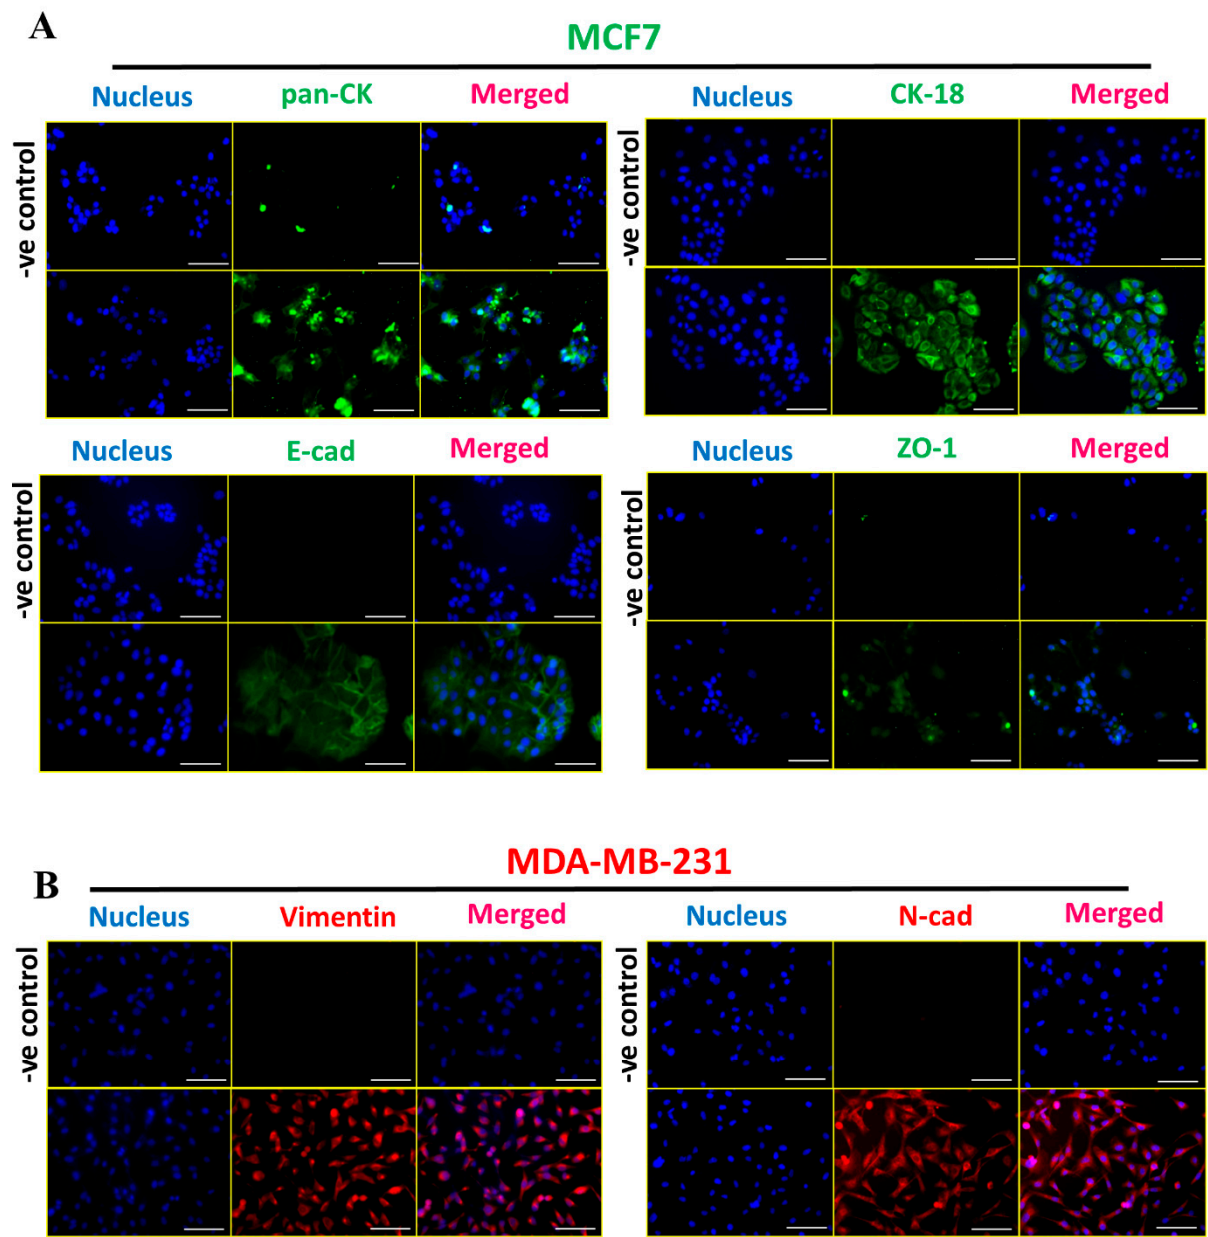

Figure S4.

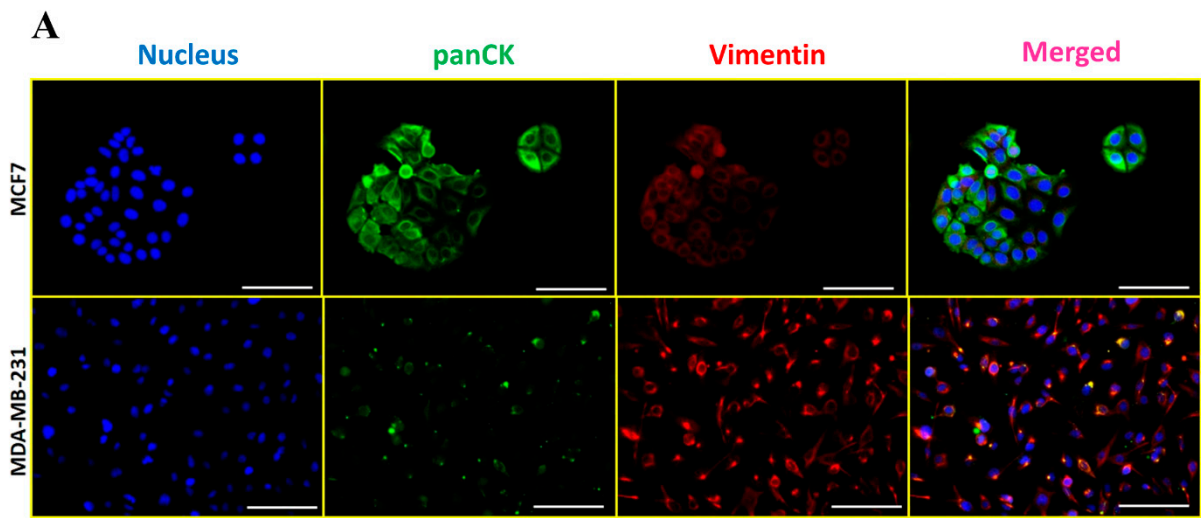

Supplement: s1 [file s1]
